# Supplementary material for: Cellulase Production by a Newly Isolated Soil Fungus Penicillium Griseofulvum A2
Source: Research Square preprint supplement (doi:10.21203/rs.3.rs-549434/v1), 2021-06-02
Supplement: Supplementary file 1 [file fff0e061ff50109c9ebc4268.docx]

**Supplementary data**

## Cellulase production by a newly isolated soil fungus *Penicillium griseofulvum* A2

Fachun Guan 1, Jie Liu 2, Jinling Cai 2, Chunyan Qi 1, Yanru Cui 1, [[1]](#footnote-1), Ligang Hou 1, *, Xie Jiao 1, Zhonghe Li 1

1. Jilin Academy of Agricultural Sciences, Changchun 130033, China.
2. College of Chemical Engineering and Materials Science, Tianjin University of Science & Technology, Tianjin Key Laboratory of Brine Chemical Engineering and Resource Eco-utilization, Tianjin 300457, China.
3. **ITS sequence (MW874977)**

TCCGAAGCTGTGGAAGGATCATTCGGGAGTGCGGGCCCCTCGGGGGCCAA

CCTCCCACCCGTGTTGCCCGAACCTATGTTGCCTCGGCGGGCCCCGCGCC

CGCCGACGGCCCCCCTGAACGCTGTCTGAAGTTGCAGTCTGAGACCTATA

ACGAAATTAGTTAAAACTTTCAACAACGGATCTCTTGGTTCCGGCATCGA

TGAAGAACGCAGCGAAATGCGATAACTAATGTGAATTGCAGAATTCAGTG

AATCATCGAGTCTTTGAACGCACATTGCGCCCTCTGGTATTCCGGAGGGC

ATGCCTGTCCGAGCGTCATTGCTGCCCTCAAGCCCGGCTTGTGTGTTGGG

CCCCGTCCCCCCCGCCGGGGGGACGGGCCCGAAAGGCAGCGGCGGCACCG

CGTCCGGTCCTCGAGCGTATGGGGCTTCGTCACCCGCTCTAGTAGGCCCG

GCCGGCGCCAGCCGACCCCCAACCTTTAATTATCTCAGGTTGACCTCGGA

TCAGGTAGGGATACCCGCTGAACTTAAGCATATCAATAAGGCGGAGGAAC

**
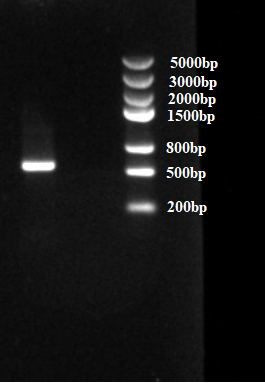
**

Figure 1. Agarose gel electrophoresis of Amplified ITS sequence.

1. Corresponding author: Jilin Academy of Agricultural Sciences, E-mail: [434965430@163.com](mailto:434965430@163.com) (Yanru Cui) and [houligang888@163.com](mailto:houligang888@163.com) (Ligang Hou). [↑](#footnote-ref-1)
